# Supplementary material
Source: publisher figshare collection journal article supplement (https://acs.figshare.com/ndownloader/files/4153852)
Supplement: Supplementary file 1 [file 4153852]

## Supporting Information

# Photoelectrochemical Properties of TiO<sub>2</sub> Nanowire Arrays: A Study of the Dependence on Length and Atomic Layer Deposition Coating

*Yun Jeong Hwang<sup>†,§</sup>, Chris Hahn<sup>†,§</sup>, Bin Liu<sup>†</sup>, and Peidong Yang<sup>\*†,‡,§</sup>*

<sup>†</sup> Department of chemistry, and <sup>‡</sup> Department of Materials Science and Engineering, University of California, Berkeley, California 94720,

<sup>§</sup> Materials Sciences Division, Lawrence Berkeley National Laboratory, Berkeley, California 94720

\*Address correspondence to [p\\_yang@berkeley.edu](mailto:p_yang@berkeley.edu)

## Supporting Information

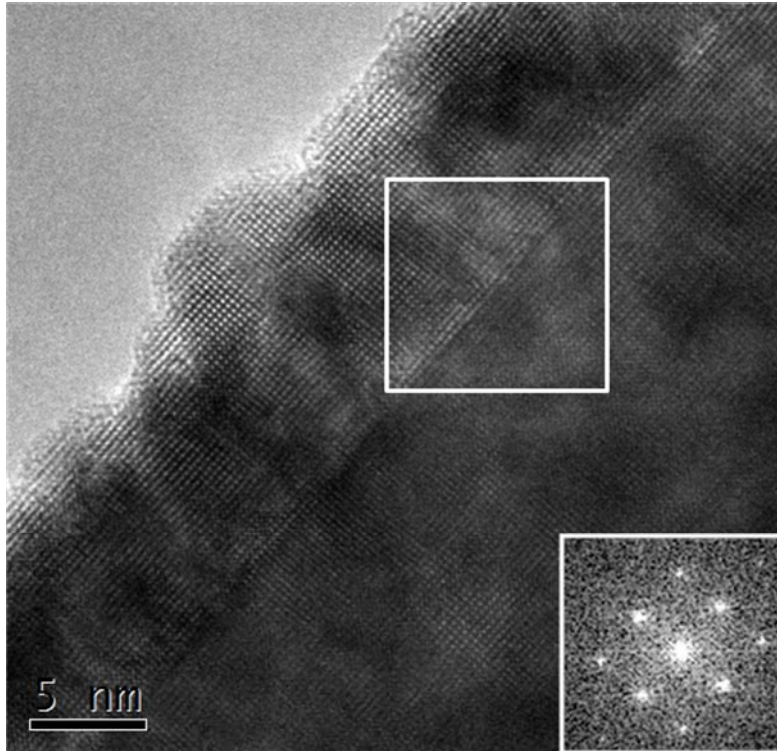

Figure S1. High resolution transmission electron microscope image of a TiO<sub>2</sub> NW with 150 ALD cycles. The inset is the fast Fourier transform (FFT) of the boxed area showing epitaxial growth of the shell at the interface.

## Supporting Information

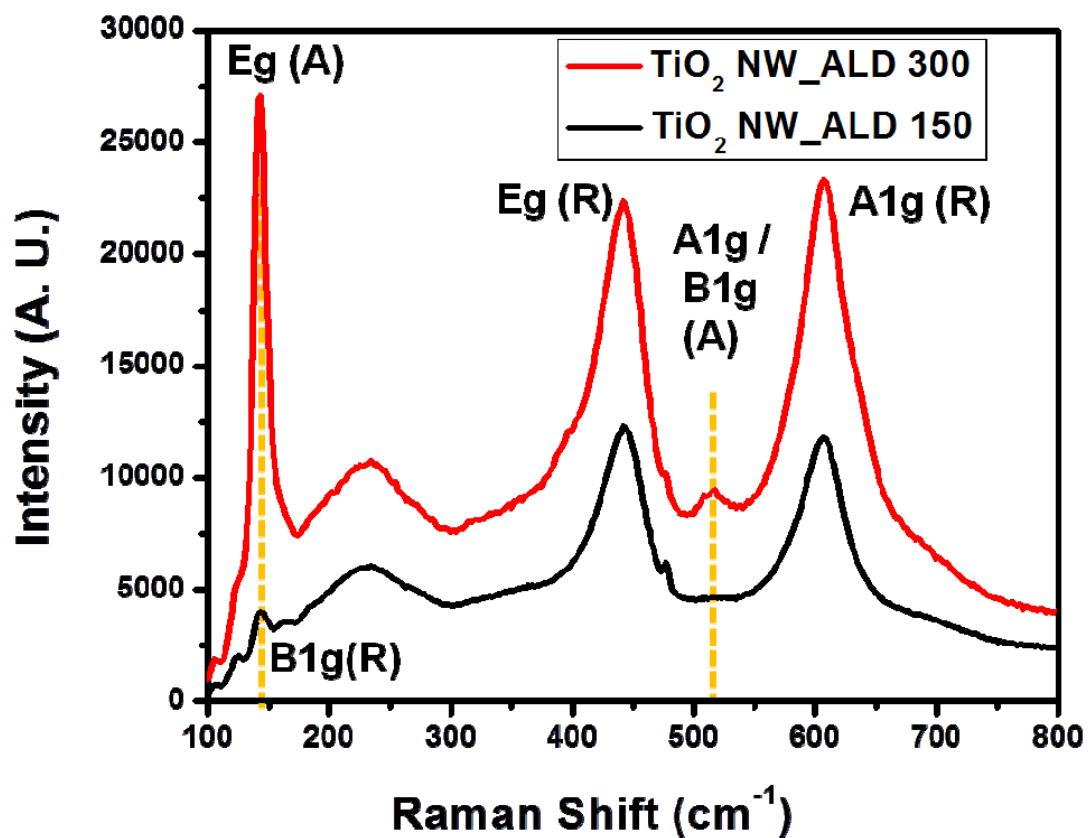

Figure S2. Raman shifts TiO<sub>2</sub> nanowires with 150 (black) and 300 ALD cycles (red). The peaks at 140 cm<sup>-1</sup>, 441 cm<sup>-1</sup> and 606 cm<sup>-1</sup> are associated with the rutile B<sub>1g</sub>, E<sub>g</sub>, and A<sub>1g</sub> modes respectively. The peaks at 141 cm<sup>-1</sup> and 515 cm<sup>-1</sup>, for nanowires with 300 ALD cycles, are associated with the E<sub>g</sub> and A<sub>1g</sub>/B<sub>1g</sub> modes of the anatase phase.
